# Supplementary material for: Analysis of the correlation between RFC4 expression and tumor immune microenvironment and prognosis in patients with cervical cancer
Source: Front Genet. 2025 May 19;16:1514383. doi: 10.3389/fgene.2025.1514383 (PMC12127329; doi:10.3389/fgene.2025.1514383)
Supplement: Supplementary file 1 [file Table2.xlsx]

## Sheet: Sheet1
Supplementary Table S2.The results of functional enrichment related to RFC4.
Gene Ontology	ID	Description	GeneRatio	BgRatio	RichFactor	FoldEnrichment	zScore	pvalue	p.adjust	qvalue	geneID	Count
Biological processes	GO:0007389	pattern specification process	25/261	474/18888	0.0527426	3.81687	7.35211	1.12365e-08	3.0215e-05	2.72515e-05	DMRT2/GPC3/EN1/DMRTA2/HOXD13/HOXD12/FOXN4/ALX3/RIPPLY3/SOSTDC1/GDNF/NEUROG1/LHX2/MSGN1/TP63/DMRT3/HEY1/DZIP1L/HOXD11/SIX2/LEFTY2/HELT/LHX1/FOLR1/HNF1B	25
Biological processes	GO:0003002	regionalization	22/261	429/18888	0.0512821	3.71117	6.72375	1.44536e-07	0.000194329	0.000175269	DMRT2/GPC3/EN1/DMRTA2/HOXD13/FOXN4/SOSTDC1/GDNF/NEUROG1/LHX2/MSGN1/TP63/DMRT3/HEY1/DZIP1L/HOXD11/SIX2/LEFTY2/HELT/LHX1/FOLR1/HNF1B	22
Biological processes	GO:0033559	unsaturated fatty acid metabolic process	10/261	115/18888	0.0869565	6.29285	6.73911	4.46047e-06	0.00271449	0.00244825	CYP2A13/AKR1C1/ALOX15/PLA2G3/AKR1C2/EDN2/CYP2F1/CYP4Z1/ALOX15B/PLA2G2F	10
Biological processes	GO:0001942	hair follicle development	9/261	94/18888	0.0957447	6.92883	6.82109	6.11718e-06	0.00271449	0.00244825	NGFR/SOSTDC1/FOXI3/SOX21/LHX2/FOXE1/TP63/LGR5/GAL	9
Biological processes	GO:0022404	molting cycle process	9/261	97/18888	0.0927835	6.71454	6.67917	7.92845e-06	0.00271449	0.00244825	NGFR/SOSTDC1/FOXI3/SOX21/LHX2/FOXE1/TP63/LGR5/GAL	9
Biological processes	GO:0022405	hair cycle process	9/261	97/18888	0.0927835	6.71454	6.67917	7.92845e-06	0.00271449	0.00244825	NGFR/SOSTDC1/FOXI3/SOX21/LHX2/FOXE1/TP63/LGR5/GAL	9
Biological processes	GO:0007129	homologous chromosome pairing at meiosis	7/261	53/18888	0.132075	9.55801	7.38513	7.95416e-06	0.00271449	0.00244825	C14orf39/SYCP2/MAEL/RNF212/STAG3/RNF212B/SYCE2	7
Biological processes	GO:0052695	cellular glucuronidation	5/261	21/18888	0.238095	17.2304	8.80884	8.23244e-06	0.00271449	0.00244825	UGT2A1/UGT1A6/UGT1A1/UGT1A4/UGT2B7	5
Biological processes	GO:0006690	icosanoid metabolic process	10/261	125/18888	0.08	5.78943	6.35942	9.40646e-06	0.00271449	0.00244825	CYP2A13/AKR1C1/ALOX15/PLA2G3/AKR1C2/EDN2/CYP2F1/CYP4Z1/ALOX15B/PLA2G2F	10
Biological processes	GO:0006805	xenobiotic metabolic process	10/261	126/18888	0.0793651	5.74348	6.32372	1.00948e-05	0.00271449	0.00244825	CYP2A13/AKR1C1/UGT1A6/UGT1A1/CYP2F1/ALDH3A1/CYP26A1/ABCC5/UGT2B7/CYP3A7	10
Molecular functions	GO:0005179	hormone activity	12/265	126/18522	0.0952381	6.6566	7.67573	2.63231e-07	0.00011161	9.72569e-05	NTS/OXT/CSH2/ENHO/EDN2/POMC/NPPC/INSL4/NPY/INS/GAL/TTR	12
Molecular functions	GO:0071855	neuropeptide receptor binding	6/265	36/18522	0.166667	11.6491	7.70515	1.10108e-05	0.00233428	0.0020341	NTS/EDN2/POMC/MRAP2/NPY/GAL	6
Molecular functions	GO:0015020	glucuronosyltransferase activity	5/265	34/18522	0.147059	10.2786	6.52404	0.000114387	0.0104377	0.00909544	UGT2A1/UGT1A6/UGT1A1/UGT1A4/UGT2B7	5
Molecular functions	GO:0019825	oxygen binding	5/265	34/18522	0.147059	10.2786	6.52404	0.000114387	0.0104377	0.00909544	NGB/CYP2F1/CYP26A1/CYP8B1/CYP3A7	5
Molecular functions	GO:0004497	monooxygenase activity	8/265	105/18522	0.0761905	5.32528	5.35476	0.000133075	0.0104377	0.00909544	CYP2A13/AKR1C1/AKR1C2/CYP2F1/CYP4Z1/CYP26A1/CYP8B1/CYP3A7	8
Molecular functions	GO:0033293	monocarboxylic acid binding	7/265	81/18522	0.0864198	6.04025	5.477	0.000159949	0.0104377	0.00909544	AKR1C1/AKR1C2/UGT1A1/RBP2/RBP1/CYP26A1/UCP1	7
Molecular functions	GO:0005501	retinoid binding	5/265	38/18522	0.131579	9.19662	6.09353	0.000196938	0.0104377	0.00909544	ADH7/UGT1A1/RBP2/RBP1/CYP26A1	5
Molecular functions	GO:0019840	isoprenoid binding	5/265	38/18522	0.131579	9.19662	6.09353	0.000196938	0.0104377	0.00909544	ADH7/UGT1A1/RBP2/RBP1/CYP26A1	5
Molecular functions	GO:0043121	neurotrophin binding	3/265	10/18522	0.3	20.9683	7.60948	0.000322574	0.015108	0.0131651	NTRK2/NGFR/FSTL4	3
Molecular functions	GO:0016712	oxidoreductase activity, acting on paired donors, with incorporation or reduction of molecular oxygen, reduced flavin or flavoprotein as one donor, and incorporation of one atom of oxygen	5/265	43/18522	0.116279	8.12725	5.63712	0.00035632	0.015108	0.0131651	CYP2A13/CYP2F1/CYP4Z1/CYP8B1/CYP3A7	5
Cellular composition	GO:0000795	synaptonemal complex	8/276	40/19894	0.2	14.4159	10.0741	6.49225e-08	9.12161e-06	8.50826e-06	C14orf39/SYCP2/SMC1B/FKBP6/RNF212/STAG3/RNF212B/SYCE2	8
Cellular composition	GO:0099086	synaptonemal structure	8/276	40/19894	0.2	14.4159	10.0741	6.49225e-08	9.12161e-06	8.50826e-06	C14orf39/SYCP2/SMC1B/FKBP6/RNF212/STAG3/RNF212B/SYCE2	8
Cellular composition	GO:0000794	condensed nuclear chromosome	8/276	81/19894	0.0987654	7.11898	6.54522	1.66157e-05	0.00155634	0.00145169	C14orf39/SYCP2/SMC1B/FKBP6/RNF212/STAG3/RNF212B/SYCE2	8
Cellular composition	GO:1904724	tertiary granule lumen	5/276	55/19894	0.0909091	6.5527	4.89106	0.000978603	0.0687468	0.0641242	CDA/ORM1/TCN1/PRSS3/PPBP	5
Cellular composition	GO:0043204	perikaryon	8/276	151/19894	0.0529801	3.81879	4.12403	0.00124782	0.0701277	0.0654123	NGB/NGFR/PRPH/NEUROG1/CPNE6/KCNH1/KCNB2/ATOH7	8
Cellular composition	GO:0034703	cation channel complex	9/276	204/19894	0.0441176	3.17999	3.71213	0.00225122	0.0953174	0.0889082	CACNA1B/KCNH1/KCNG3/HTR3A/KCNB2/SCNN1B/TRPV6/SCN8A/CACNA2D3	9
Cellular composition	GO:0031093	platelet alpha granule lumen	5/276	67/19894	0.0746269	5.37908	4.25862	0.00237446	0.0953174	0.0889082	LEFTY2/AHSG/ORM1/PPBP/ORM2	5
Cellular composition	GO:0034702	monoatomic ion channel complex	12/276	344/19894	0.0348837	2.51441	3.36067	0.00324561	0.114002	0.106337	CNIH2/GRIN2C/CACNA1B/GABRQ/KCNH1/KCNG3/HTR3A/KCNB2/SCNN1B/TRPV6/SCN8A/CACNA2D3	12
Cellular composition	GO:0034774	secretory granule lumen	11/276	322/19894	0.0341615	2.46235	3.1379	0.00553276	0.154628	0.144231	POMC/LEFTY2/AHSG/CDA/INS/S100P/ORM1/TCN1/PPBP/ORM2/TTR	11
Cellular composition	GO:0060205	cytoplasmic vesicle lumen	11/276	325/19894	0.0338462	2.43962	3.10372	0.00591951	0.154628	0.144231	POMC/LEFTY2/AHSG/CDA/INS/S100P/ORM1/TCN1/PPBP/ORM2/TTR	11
Kyoto Encyclopedia of Genes and Genomes	hsa00980	Metabolism of xenobiotics by cytochrome P450	10/120	79/8847	0.126582	9.33228	8.72286	9.46703e-08	1.89341e-05	1.74393e-05	ADH7/UGT2A1/CYP2A13/AKR1C1/UGT1A6/UGT1A1/CYP2F1/UGT1A4/ALDH3A1/UGT2B7	10
Kyoto Encyclopedia of Genes and Genomes	hsa00140	Steroid hormone biosynthesis	8/120	62/8847	0.129032	9.5129	7.88741	1.66221e-06	0.000166221	0.000153098	UGT2A1/AKR1C1/UGT1A6/AKR1C2/UGT1A1/UGT1A4/UGT2B7/CYP3A7	8
Kyoto Encyclopedia of Genes and Genomes	hsa00830	Retinol metabolism	8/120	68/8847	0.117647	8.67353	7.44833	3.39592e-06	0.000226395	0.000208522	ADH7/UGT2A1/UGT1A6/UGT1A1/UGT1A4/CYP26A1/UGT2B7/CYP3A7	8
Kyoto Encyclopedia of Genes and Genomes	hsa05204	Chemical carcinogenesis - DNA adducts	8/120	71/8847	0.112676	8.30704	7.2486	4.72486e-06	0.000236243	0.000217592	UGT2A1/CYP2A13/UGT1A6/AKR1C2/UGT1A1/UGT1A4/UGT2B7/CYP3A7	8
Kyoto Encyclopedia of Genes and Genomes	hsa00053	Ascorbate and aldarate metabolism	5/120	30/8847	0.166667	12.2875	7.26155	4.58772e-05	0.00183509	0.00169021	UGT2A1/UGT1A6/UGT1A1/UGT1A4/UGT2B7	5
Kyoto Encyclopedia of Genes and Genomes	hsa00982	Drug metabolism - cytochrome P450	7/120	73/8847	0.0958904	7.06952	6.10588	5.50627e-05	0.00183542	0.00169052	ADH7/UGT2A1/UGT1A6/UGT1A1/UGT1A4/ALDH3A1/UGT2B7	7
Kyoto Encyclopedia of Genes and Genomes	hsa00983	Drug metabolism - other enzymes	7/120	81/8847	0.0864198	6.3713	5.69446	0.000107462	0.00284327	0.0026188	UGT2A1/UGT1A6/UPB1/UGT1A1/UGT1A4/CDA/UGT2B7	7
Kyoto Encyclopedia of Genes and Genomes	hsa00040	Pentose and glucuronate interconversions	5/120	36/8847	0.138889	10.2396	6.51362	0.000113731	0.00284327	0.0026188	UGT2A1/UGT1A6/UGT1A1/UGT1A4/UGT2B7	5
Kyoto Encyclopedia of Genes and Genomes	hsa00860	Porphyrin metabolism	5/120	46/8847	0.108696	8.01359	5.59223	0.000371166	0.00824813	0.00759696	UGT2A1/UGT1A6/UGT1A1/UGT1A4/UGT2B7	5
Kyoto Encyclopedia of Genes and Genomes	hsa04080	Neuroactive ligand-receptor interaction	14/120	368/8847	0.0380435	2.80476	4.14669	0.000439192	0.00878385	0.00809038	NTS/OXT/SSTR5/CSH2/GRIN2C/EDN2/GABRQ/ADRA2B/POMC/VIPR1/RXFP4/NPY/PRSS3/GAL	14
